# Supplementary material
Source: Springer Nature journal article supplement (https://www.springermedizin.de/resource/supplementary/12936_2012_2222_MOESM15_ESM.pdf/9542712)
Supplement: MOESM15 [file 9542712]

**Table 1. Decreased Mean Spot Forming Cells in Ad5 Immune animals**

| <b>Vaccination</b> | <b>Ad5 Naive</b> | <b>Ad5 Immune</b> |
|--------------------|------------------|-------------------|
| Naive              | 2.71             | 2.71              |
| Ad5-CSP/Ad5-CSP    | 791.25           | 2.80              |
| Ad5-CSP/Ad4-CSP    | 708.00           | 74.50             |
| Ad4-CSP/Ad4-CSP    | 527.20           | 79.60             |
| Ad4-CSP/Ad5-CSP    | 1100             | 57.60             |
